# Supplementary material
Source: PubMed Central journal article supplement (PMC9452375)
Supplement: NIHMS1832376-supplement-Supp_data_and_notes.pdf [file NIHMS1832376-supplement-Supp_data_and_notes.pdf]

**Supplementary Data 1.** Alanine substitutions and position variants of APNCYGNIPL. Applied in

Supplementary Fig. 2

| <b>Substitution</b> | <b>Sequence</b> | <b>Position variant</b> | <b>Sequence</b> |
|---------------------|-----------------|-------------------------|-----------------|
| original            | APNCYGNIPL      | original                | APNCYGNIPL      |
| P1 -Ala             | APNCYGNIPL      | -6 towards N-term       | CKLLEIAPNC      |
| P2 -Ala             | AANCYGNIPL      | -5 towards N-term       | KLLEIAPNCY      |
| P3 -Ala             | APACYGNIPL      | -4 towards N-term       | LLEIAPNCYG      |
| P4 -Ala             | APNAYGNIPL      | -3 towards N-term       | LEIAPNCYGN      |
| P5 -Ala             | APNCAGNIPL      | -2 towards N-term       | EIAPNCYGNI      |
| P6 -Ala             | APNCYANIPL      | -1 towards N-term       | IAPNCYGNIP      |
| P7 -Ala             | APNCYGAIPL      | +1 towards C-term       | PNCYGNIPLM      |
| P8 -Ala             | APNCYGNAPL      | +2 towards C-term       | NCYGNIPLMK      |
| P9 -Ala             | APNCYGNIAL      | +3 towards C-term       | CYGNIPLMKA      |
| P10 -Ala            | APNCYGNIPA      | +4 towards C-term       | YGNIPLMKAA      |
| 9-mer               | APNCYGNIP       | +5 towards C-term       | GNIPLMKA AF     |
| P1 -Ala             | APNCYGNIP       | +6 towards C-term       | NIPLMKA AFK     |
| P2 -Ala             | AANCYGNIP       |                         |                 |
| P3 -Ala             | APACYGNIP       |                         |                 |
| P4 -Ala             | APNAYGNIP       |                         |                 |
| P5 -Ala             | APNCAGNIP       |                         |                 |
| P6 -Ala             | APNCYANIP       |                         |                 |
| P7 -Ala             | APNCYGAIP       |                         |                 |
| P8 -Ala             | APNCYGNAP       |                         |                 |
| P9 -Ala             | APNCYGNIA       |                         |                 |

**Supplementary Data 2.** Alanine substitutions and position variants of EWWRSGGFSF. Applied in

Supplementary Fig. 2

| Substitution | Sequence    | Position variant  | Sequence    |
|--------------|-------------|-------------------|-------------|
| original     | EWWRSGGFSF  | original          | EWWRSGGFSF  |
| P1 -Ala      | AWWRSGGFSF  | -6 towards N-term | GTTKFKEWWR  |
| P2 -Ala      | EAWRSGGFSF  | -5 towards N-term | TTKFKEWWR   |
| P3 -Ala      | EWARSGGFSF  | -4 towards N-term | TKKFKEWWRSG |
| P4 -Ala      | EWWRASGGFSF | -3 towards N-term | KKFKEWWRSGG |
| P5 -Ala      | EWWRAGGFSF  | -2 towards N-term | FKEWWRSGGF  |
| P6 -Ala      | EWWRSAGFSF  | -1 towards N-term | KEWWRSGGFS  |
| P7 -Ala      | EWWRSGAFSF  | +1 towards C-term | WWRSGGFSFG  |
| P8 -Ala      | EWWRSGGASF  | +2 towards C-term | WRSGGFSFGK  |
| P9 -Ala      | EWWRSGGFASF | +3 towards C-term | RSGGFSFGKA  |
| P10 -Ala     | EWWRSGGFSA  | +4 towards C-term | SGGFSFGKAY  |
| 9-mer        | EWWRSGGFS   | +5 towards C-term | GGFSFGKAYE  |
| P1 -Ala      | AWWRSGGFS   | +6 towards C-term | GFSFGKAYEY  |
| P2 -Ala      | EAWRSGGFS   |                   |             |
| P3 -Ala      | EWARSGGFS   |                   |             |
| P4 -Ala      | EWWRASGGFS  |                   |             |
| P5 -Ala      | EWWRAGGFS   |                   |             |
| P6 -Ala      | EWWRSAGFS   |                   |             |
| P7 -Ala      | EWWRSGAFS   |                   |             |
| P8 -Ala      | EWWRSGGAS   |                   |             |
| P9 -Ala      | EWWRSGGFA   |                   |             |

**Supplementary Data 3.** APNCYGNIPL peptide variants applied in Fig. 1a-c,g and Supplementary Fig. 3 and Supplementary Fig. 5. See enclosed excel file.

**Supplementary Data 4.** EWWRSGGFSF peptide variants applied in Fig. 1d-f,h-k and Supplementary Fig. 4 and Supplementary Fig. 6. See enclosed excel file.

**Supplementary Data 5.** Information content of the structure-based model of APNCYGNIPL bound to HLA-B\*0702. Related to Supplementary Fig. 7.

| Position | 1    | 2    | 3    | 4    | 5    | 6    | 7    | 8    | 9    | 10   |
|----------|------|------|------|------|------|------|------|------|------|------|
|          | 0.88 | 3.27 | 1.09 | 0.22 | 0.25 | 4.24 | 0.71 | 0.26 | 0.41 | 2.09 |

**Supplementary Data 6.** Information content of the structure-based model of EWWRSGGFSF bound to HLA-A\*2402. Related to Supplementary Fig. 8.

| Position | 1    | 2    | 3    | 4    | 5    | 6    | 7    | 8    | 9    | 10   |
|----------|------|------|------|------|------|------|------|------|------|------|
|          | 0.35 | 1.32 | 0.66 | 0.21 | 0.17 | 3.87 | 3.44 | 0.26 | 0.30 | 2.41 |

**Supplementary Data 7.** EWWRSGGFSF double substitution variants applied in Fig. 1i-k and Supplementary Fig. 9. The MHC multimer panel comprised these peptides and the single substitution peptides listed in Supplementary Data 4. See enclosed excel file.

**Supplementary Data 8.** SIINFEKL peptide variants applied in Fig. 2a-d, Supplementary Fig. 10 and Supplementary Fig. 11. See enclosed excel file.

**Supplementary Data 9.** Sequence information on the TCRs of the 12 HLA-A\*0201<sub>KLL</sub> responsive clones. Related to Fig. 2e-g and Supplementary Fig. 12

| <b>Patient</b> | <b>Clone</b> | <b>TRA sequence*</b> | <b>TRB sequence*</b> |
|----------------|--------------|----------------------|----------------------|
| w678           | 1            | CVLNNNDMRF           | CAIRQFDANTGELFF      |
|                | 1.5          | unknown alpha        | CAIRQFDANTGELFF      |
|                | 2            | CAFRVSHDMRF          | CASSIAGSSYNEQFF      |
|                | 3            | CVVATYSGGGADGLTF     | CASSIAGSSYNEQFF      |
|                | 4            | CVVATYSGGGADGLTF     | CASSSGNPSTDTQYF      |
| w876           | 2            | CVVTEYSGGGADGLTF     | CASRGQNTGELFF        |
|                | 5            | CAYNQGGKLIF          | CASSVLNTGELFF        |
|                | 5.5          | unknown alpha        | CASSVLNTGELFF        |
|                | 6            | CVVPLYSSASKIIF       | CASSDTPDLNTEAFF      |
|                | 9            | CVGNNNDMRF           | CAIRRQDQNTGELFF      |
| w830           | 4            | CVLNNNDMRF           | CASSILGASNQPQHF      |
| w683           | 1            | CVVALYSGGGADGLTF     | CASRSQNYGYTF         |

\* Although, the TCR recognition pattern is ultimately determined by the TCR sequence, the specific involvement of alpha and beta variable regions did not explain all the differences observed between the TCR fingerprints (**Fig. 2e**). Some TCRs with shared beta sequences (TRB) showed very similar fingerprints, e.g. clone 2 and clone 3 of patient w678, while other TCRs also sharing the same beta domain were substantially different in their recognition pattern, e.g. clone 5 and 5.5 of patient 876. Hence, the sequence of the alpha and beta variable regions were not sufficient to predict the TCR recognition similarities across the T cell clones.

**Supplementary Data 10.** KLLLEIAPNC peptide variants applied in Fig. 2 and Supplementary Fig. 12.

See enclosed excel file.

**Supplementary Data 11.** The estimated promiscuity of the 12 MCC clones screened in Fig. 2e-g and Fig. 3.

| <b>Clonal TCR</b> | <b># of potential targets (adjusted for pMHC anchors)</b> | <b># of potential targets (not adjusted)</b> |
|-------------------|-----------------------------------------------------------|----------------------------------------------|
| w678_1            | 432                                                       | 1,296                                        |
| w678_1.5          | 810                                                       | 3,645                                        |
| w678_2            | 28,080                                                    | 425,880                                      |
| w678_3            | 25,740                                                    | 360,360                                      |
| w678_4            | 264                                                       | 1,408                                        |
| w876_2            | 24                                                        | 24                                           |
| w876_5            | 48                                                        | 56                                           |
| w876_5.5          | 216                                                       | 288                                          |
| w876_6            | 360                                                       | 960                                          |
| w876_9            | 384                                                       | 1,344                                        |
| w683_1            | 12                                                        | 18                                           |
| w830_4            | 264                                                       | 528                                          |
| OT-1              | 13,056                                                    | 864,688                                      |
| OT-3              | 62,208                                                    | 1,749,600                                    |

**Supplementary Data 12.** The 75 peptides that comprise the top-10 of the FIMO-based priority list that best match each of the TCR fingerprints of the 12 HLA-A\*0201 MCCCKLL engaging TCRs. Including the original KLEIAPNC target. Related to Fig. 3 and Supplementary Fig. 12. See enclosed excel file.

**Supplementary Data 13.** Expression characteristics of ST6 N-acetylgalactosaminide. Related to Fig.

3.

|                   |                                                           |                           |              |
|-------------------|-----------------------------------------------------------|---------------------------|--------------|
| <b>Gene</b>       | ST6GALNAC3                                                |                           |              |
| <b>Protein</b>    | ST6 N-acetylgalactosaminide alpha-2,6-sialyltransferase 3 |                           |              |
| <b>Organism</b>   | Human                                                     |                           |              |
| <b>Function</b>   | Sialyltransferase                                         |                           |              |
| <b>Pathway</b>    | Protein glycosylation                                     |                           |              |
| <b>Expression</b> | <b>Tissue</b>                                             | <b>Cell types</b>         | <b>Stain</b> |
|                   | Muscle tissue                                             | Myocytes                  | Medium /     |
|                   | Endocrine tissue                                          | Glandular cells           | Low          |
|                   | Gastrointestinal tract                                    | Glandular cells           | Low          |
|                   | Breasts and female reproductive                           | Squamous epithelial cells | Low          |
|                   | Brain                                                     | Neuronal cells            | Low          |

## Supplementary Note 1. Concept of establishing TCR recognition patterns

We examine the requirements for TCR interaction with pMHC by the use of collections of peptide variants. The variants are based on the peptide that was originally described as the target of the given TCR, and includes peptides generated from sequentially substituting one or more positions of the originally identified target with all naturally occurring amino acids (**Supplementary Fig. 1**). All peptide variants are loaded onto MHC molecules and multimerized on a PE-labeled dextran backbone that is also individually labeled with different DNA barcodes, such that each pMHC variation is specifically associated with a unique DNA barcode<sup>16</sup>. Subsequently, T cells expressing a given TCR (either TCR-transduced T cells or T-cell clones) are stained with the whole pool of DNA barcode-labeled MHC multimers generated from the given collection of peptide variants (**Supplementary Fig. 1**). TCR clonal T cells will bind several different pMHCs in a hierarchy-based manner that is determined by the affinity between the pMHC and the given TCR (**Supplementary Fig. 1**). Upon selection of clonal MHC multimer-binding T cells, the MHC multimer-associated DNA barcodes can be retrieved and the number of DNA barcode reads reflects the relative binding hierarchy amongst the different pMHCs included in the analyses. ‘Barracoda’ (<http://www.cbs.dtu.dk/services/barracoda>), the software developed to analyze sequencing data from DNA barcode-labeled MHC multimers<sup>16</sup>, is used to retrieve the number of read counts for each pMHC-associated DNA barcode, and to calculate the  $\log_2FC$  in read counts relative to the mean read counts of three baseline samples. The baseline samples consist of unprocessed aliquots of the full library of DNA barcode-labeled MHC multimers. Unprocessed in the meaning that the multimers are not mixed with cell samples, but the DNA barcodes within each aliquot are directly amplified and sequenced. Thus, the baseline samples enables normalization of the DNA barcode reads of the samples relative to the actual input of DNA barcodes from the MHC multimer panel. The methodology has some similarities to deep mutational scanning<sup>26,27</sup>

that determines the impact of certain mutations on a phenotypical or functional readout. Using the DNA barcode-tagged MHC multimers we can select very precisely for T cells binding to the pMHC complexes, and through a flow cytometry based cell sorting procedure, retrieve only the DNA barcodes associated to pMHC complexes of relevance for T cell binding, out of a large pool of irrelevant pMHC associated DNA barcodes, even after only a single round of selection<sup>16</sup>.

When assessing the TCR fingerprint, the position of a given pMHC within the binding hierarchy is defined based on the  $\log_2FC$  value given by 'Barracoda'. The contribution of each individual amino acid at a given position can be determined based on the presence of a given peptide in the binding hierarchy. Such contributions can be visualized as a heat map or translated into a sequence logo, referred to as the TCR fingerprint, which serves to visualize the TCR recognition pattern, with the size of the one-letter amino acid code reflecting the selectivity of that TCR at the given position

(**Supplementary Fig. 1**). The TCR fingerprinting strategy can be applied to any TCR restricted to a foldable MHC class I molecule, however it does required the generation of a peptide amino acid substitution library unique for each TCR specificity, and consequently may be advantageous specifically for collections of TCRs raised for the same specificity.

### **Supplementary Note 2: Feasibility and sensitivity for resolving the binding hierarchy of TCR-pMHC interactions**

To prove the feasibility of our strategy for resolving the binding hierarchy of multiple pMHCs that are recognized by the same TCR, we generated a collection of DNA barcode-labeled MHC multimers that contained variants of a MCPyV-derived 10-mer HLA-B\*0702-restricted peptide, APNCYGNIPL. T cells transduced with a TCR recognizing this target were stained with a smaller panel of DNA barcode-labeled MHC multimers generated from single amino acid substitutions using only alanine (A) and

length (9-mer) or position variants of the original APNCYGNIPL peptide, resulting in 34 peptide variants (**Supplementary Fig. 2** and **Supplementary Data 1**). Length (9-mer) or position variants were included to ensure that TCR recognition was only feasible at the determined position of the protein, and the original length of the peptide. Although recognition of position and length variants are less likely to occur, compared to single amino acid substitution within the original peptide, examples of TCRs recognizing both 9 and 10mer variants of the same peptide has been reported<sup>51</sup>. To ensure that low-avidity interactions were not outcompeted by high-avidity interactions in a parallel screening, we first used this panel as a basis in a set of three consecutive analyses where we 1) included the full collection of MHC multimer variants, 2) excluded the multimers carrying the original peptide and 3) excluded the multimers carrying the original peptide and the additional four peptide variants with the strongest pMHC-TCR interactions (**Supplementary Fig. 2**). For the same purpose we repeated the analyses, either applying 5- or 25-fold reduced amounts of the multimer reagents, compared to what was used in the initial analysis (i.e., 4.6 nM and 0.92 nM of each pMHC, **Supplementary Fig. 2**). The results were comparable, and showed that any potential competition between the different pMHCs did not limit our detection of low-affinity binders and that our platform for determining the binding hierarchy was sensitive enough to detect both high-avidity and low-avidity interactions simultaneously. Next, we applied collections of MHC multimers where the peptide variants were generated from substituting with either lysine (K), which has a positively-charged side chain, or glutamic acid (E), which has a negatively-charged side chain. These parallel stainings verified that alanine substitutions alone are insufficient to describe the critical pMHC-TCR interaction points (**Supplementary Fig. 2**).

### Supplementary Note 3. Investigation of peptide-MHC stability

#### *MHC- ELISA*

The MHC-ELISA was performed as previously described<sup>19</sup>. In brief, specific peptide-MHC complexes were generated by UV-mediated peptide exchange (2.5 nmol/L, based on 100% rescue) and incubated on streptavidin-coated plates (2 mg/mL) for 1 h at 37 °C. Subsequently the peptide-MHCs were incubated with horseradish peroxidase-conjugated  $\beta_2$ -m antibody (1.4 mg/mL; Acris GmbH), which bind only to correctly folded MHC molecules, for 1 h at 37 °C. After washing, a colorimetric reaction was initiated by the addition of tetramethylbenzidine peroxidase substrate. Absorbance was determined (450 nm wavelength) by an ELISA reader.

#### *Bead capture of correctly folded MHC*

The stability of the HLA-A\*2402-EWWRSGGFSF peptide variations were measured by capturing all correctly folded pMHCs within the combined MHC multimer panel with beads coated with anti-HLA-ABC monoclonal antibodies (clone W6/32, Biologend 311334) (**Supplementary Fig. 6**). The antibody coated beads were produced from QuantumPlexM Streptavidin beads (Bangs Laboratories) by first washing according to manufactures instructions and incubating with antibody (10,000 beads:25 ng W6/32 antibody) for 30 min at 4 °C. The beads were washed twice in barcode-cytometry buffer (PBS + 0.5% BSA + 100  $\mu$ g/mL herring DNA + 2 mM EDTA) and were subsequently incubated with 1  $\mu$ M biotin (Avidity, Bio200) for 30 min at 4 °C. For capture of correctly folded MHC, the full DNA barcode-labeled MHC multimer library (1.15 pmol of each pMHC =0.22  $\mu$ mol total MHC) were incubated with 10,000 W6/32 coated beads for 30 min at 4 °C, then washed three times in barcode-cytometry buffer (PBS + 0.5% BSA + 100  $\mu$ g/mL herring DNA + 2 mM EDTA) before sorting all

beads in a FSC-SSC plot. The sorted beads were centrifuged for 10 min at 5,000g and the buffer was removed. The pellet was stored at  $-80^{\circ}\text{C}$  in a minimal amount of residual buffer ( $<20\ \mu\text{L}$ ). The pMHC associated DNA barcodes were amplified and sequenced as described previously<sup>16</sup>, and the presence of correctly folded pMHCs within the MHC multimer panel could be verified through the presence of the corresponding DNA barcode (**Supplementary Fig. 6**).

#### **Supplementary Note 4. T-cell functional assays**

##### *EC<sub>50</sub> determination*

The EC<sub>50</sub> values for MCC CD8<sup>+</sup> T cell clones were determined in a previous study<sup>22</sup>. Briefly, secreted IFN- $\gamma$  was measured after incubating  $2 \times 10^4$  clonal T cells with  $5 \times 10^4$  peptide-pulsed T2 cells (peptide sequence KLLLEIAPNC). Peptide was used at log<sub>10</sub> dilutions to a final concentration from  $10^6$  to  $10^{12}$  molar in 200 mL of T-cell medium for 36 hours. IFN- $\gamma$  in cell culture supernatants was assayed by ELISA according to the manufacturer's recommendations (Human IFN gamma ELISA Ready-SET-Go Kit; Affymetrix). The amount of IFN- $\gamma$  secretion by each T-cell clone was used to estimate the EC<sub>50</sub> of each clone, i.e., the amount of peptide leading to 50% of the maximum level of IFN- $\gamma$  secretion.

##### *Intracellular cytokine staining*

MCC CD8<sup>+</sup> T-cell clones and T2 cells were thawed and washed in RPMI + 10% FCS. T2 cells were resuspended in X-vivo + 5% human serum, pulsed with 5  $\mu\text{M}$  peptide, and left at room temperature for 2 h. 150,000 T cells were stimulated with pulsed T2 cells at a 1:1 ratio. GolgiPlug (BD, 555029) (1/250 dilution) and PE-conjugated anti-CD107 (BD, 555801) (1/10 dilution) were added before incubation for 4 h at  $37^{\circ}\text{C}$  and 5% CO<sub>2</sub>. Cells were washed twice in PBS + 10% FCS and stained with surface

antibodies: FITC-conjugated anti-CD3 antibody (BD, 345763) and BV-510-conjugated anti-CD8 antibody (BD, 563256 (final dilution 1/10 of each antibody) and dead cell marker (LIVE/DEAD Fixable Near-IR; Invitrogen L10119) (final dilution 1/1,000) and incubated for 30 min at 4 °C. Cells were washed twice in PBS + 10% FCS and incubated overnight at 4 °C in fixation buffer (1:4, eBioscience 00-5123-43, to diluent eBioscience 00-5223-56). The following day, cells were washed and resuspended in permeabilization buffer (1:10 buffer to water, eBioscience 00-8333-56) and stained with intracellular antibodies PE-Cy7-conjugated anti-TNF $\alpha$  antibody (BioLegend, 502930), APC-conjugated anti-IFN $\gamma$  antibody (BD 341117), and Brilliant Violet 421 anti-IL-2 antibody (BioLegend, 500328) (final dilution 1/10 of each antibody), for 30 min at 4 °C. Cells were washed in permeabilization buffer and resuspended in PBS + 10% FCS.

51. Andersen, R. S. *et al.* High frequency of T cells specific for cryptic epitopes in melanoma patients. *Oncoimmunology* **2**, e25374 (2013).
